# Supplementary material
Source: Research Square preprint supplement (doi:10.21203/rs.3.rs-9553769/v1)
Supplement: Supplementary file 1 [file d4be63ad81985c57d9569401.pdf]

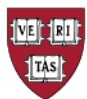

**HARVARD**

Human Research Protection Program

Harvard Medical School  
Office of Regulatory Affairs & Research Compliance  
90 Smith Street, 3rd Floor  
Boston MA, 02120  
FWA: FWA00007071

### **Notification of Determination - Not Human Subjects Research**

November 20, 2024

John Naslund  
john\_naslund@hms.harvard.edu

**Protocol Title:** Analyzing Behavioral Patterns in an Online Peer-to-Peer Mental Health Support Platform  
**Principal Investigator:** John Naslund  
**Protocol #:** IRB24-1479  
**Funding Source:** None  
**IRB Review Date:** 11/20/2024  
**IRB Review Action:** Not Research [45 CFR 46.102(l)]

The Institutional Review Board (IRB) of the Harvard Faculty of Medicine determined that this submission is not human subjects research as defined by DHHS regulations or FDA regulations.

The IRB made the following determinations:

- Research Information Security Level (based on Harvard Research Data Security Policy): Non-Sensitive

Additional review is not required. This determination applies only to the activities described in the IRB submission. Any changes that may alter this determination must be submitted via a modification (use the Modify Study button in the ESTR system) for review.

Questions?

If you have any questions, leave a comment on the ESTR Workspace. For instructions on how to enter a comment in the system and notify the Review Specialist/IRB Coordinator, visit the ESTR Support Site – Communicating with Staff (<https://estrsupport.fss.harvard.edu/communicating-with-staff>).

Feedback?

If you have feedback on this submission, or your IRB review experience, we would love to have your thoughts! Pl
